# Supplementary material for: Oxidation and ATP dual-responsive block copolymer containing tertiary sulfoniums: self-assembly, protein complexation and triggered release
Source: Royal Society of Chemistry journal article supplement (doi:10.1039/d0py01622e), 2021-01-01
Supplement: d0py01622e1.pdf [file d0py01622e1.pdf]

## Supporting Information

### **Oxidation and ATP Dual-Responsive Block Copolymer Containing Tertiary Sulfoniums: Self-Assembly, Protein Complexation and Triggered Release**

Yanfen Jiang,<sup>†</sup> Shuqi Dong,<sup>†</sup> Guoyang Qin,<sup>†</sup> Li Liu,<sup>\*†</sup> Hanying Zhao<sup>†,§</sup>

<sup>†</sup>Key Laboratory of Functional Polymer Materials, Ministry of Education, Institute of Polymer Chemistry, College of Chemistry, Nankai University, <sup>§</sup>Collaborative Innovation Center of Chemical Science and Engineering (Tianjin), Tianjin 300071, P. R. China.

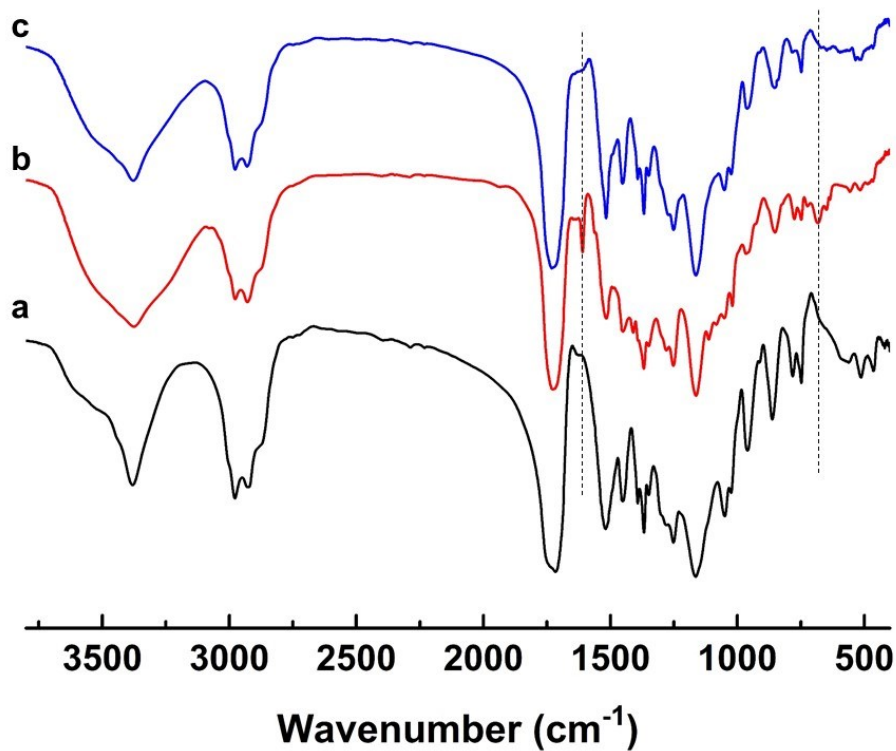

**Fig. S1** FTIR spectra of (a) PEG<sub>45</sub>-*b*-P(Boc-METMA)<sub>32</sub>, (b) PEG<sub>45</sub>-*b*-P(METMA/PBA<sub>29</sub>)<sub>32</sub>, and (c) PEG<sub>45</sub>-*b*-P(METMA/PBA<sub>29</sub>)<sub>32</sub> after 24 h of incubation with H<sub>2</sub>O<sub>2</sub>.

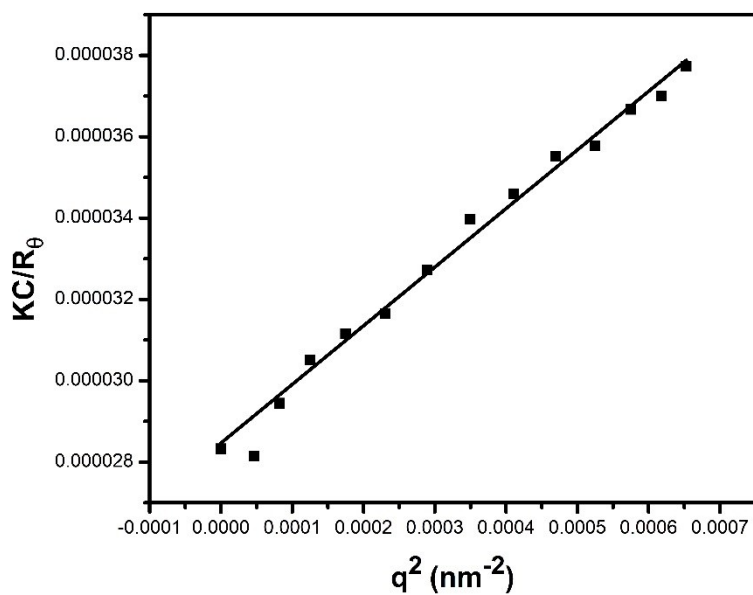

**Fig. S2** KC/R<sub>0</sub> vs the square of the scattering vector (q<sup>2</sup>) for PEG<sub>45</sub>-*b*-P(METMA/PBA<sub>29</sub>)<sub>32</sub> micelles.

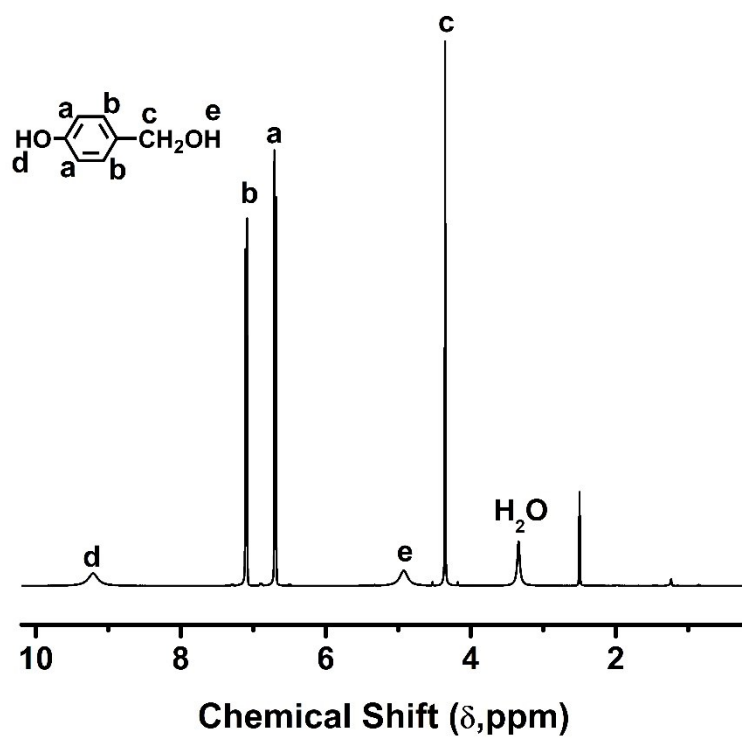

**Fig. S3** <sup>1</sup>H NMR spectrum of 4-hydroxybenzyl alcohol in *d*<sub>6</sub>-DMSO.

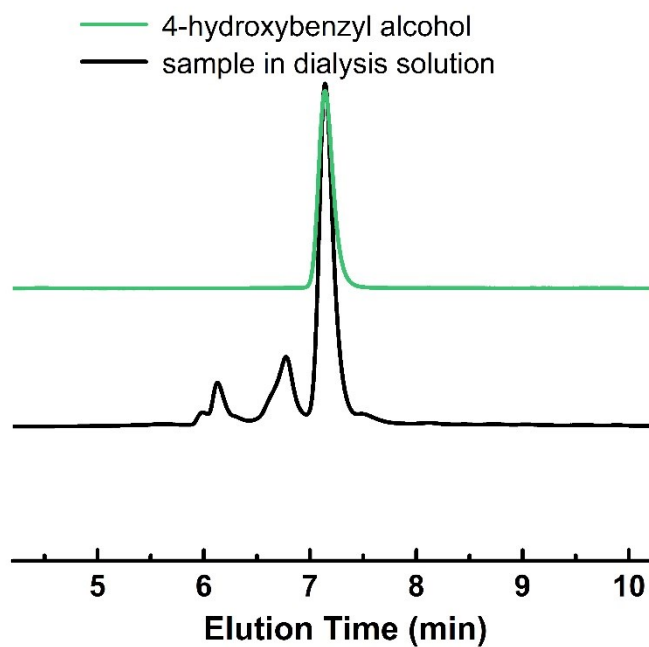

**Fig. S4** HPLC analysis of the sample in the dialysis solution of the PEG<sub>45</sub>-*b*-P(METMA/PBA<sub>29</sub>)<sub>32</sub> micelles after reaction with H<sub>2</sub>O<sub>2</sub> for 15 min.

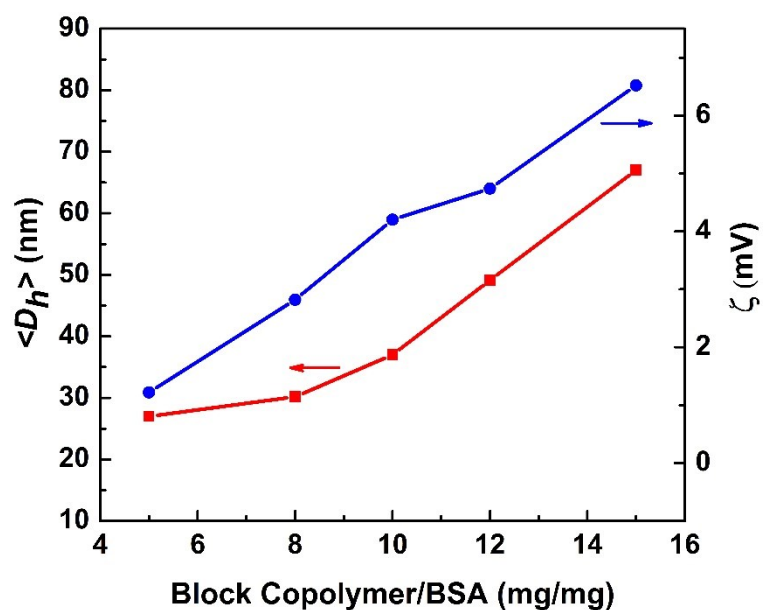

**Fig. S5** Dependence of the size and  $\zeta$  potential of BSA-entrapped micelles on mass ratio of PEG<sub>45</sub>-*b*-P(METMA/PBA<sub>29</sub>)<sub>32</sub> to BSA.

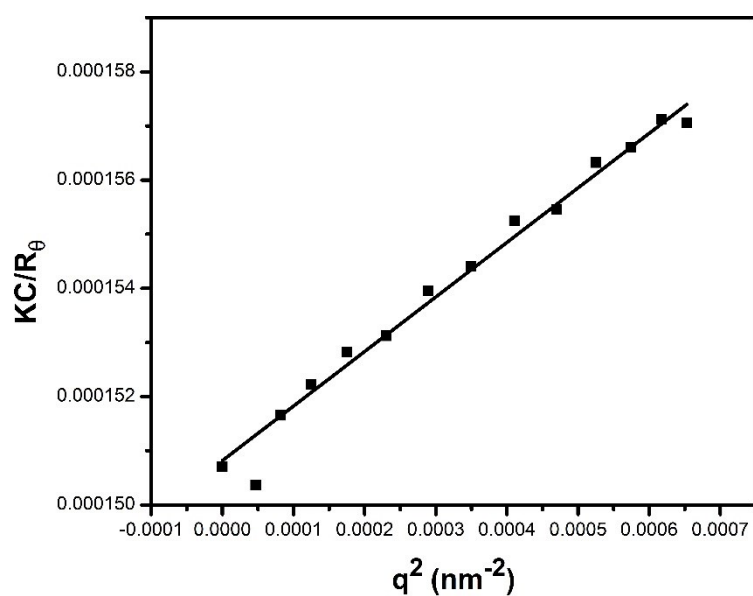

**Fig. S6**  $KC/R_0$  vs the square of the scattering vector ( $q^2$ ) for BSA10-micelles.

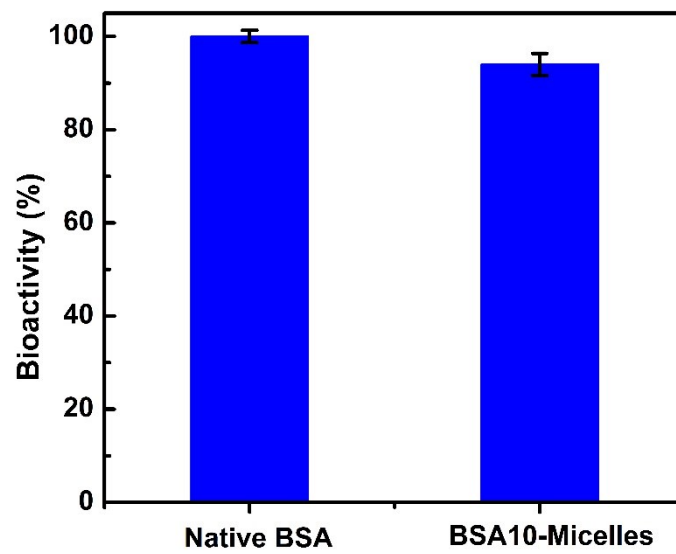

**Fig. S7** Esterase-like activities of native BSA and the BSA10-micelles.
